# Supplementary material for: SOX2 Expression Is Regulated by BRAF and Contributes to Poor Patient Prognosis in Colorectal Cancer
Source: PubMed Central journal article supplement (PMC4092103; doi:10.1371/journal.pone.0101957), 2014-07-10
Supplement: pone.0101957.s001.pdf [file pone.0101957.s001.pdf]

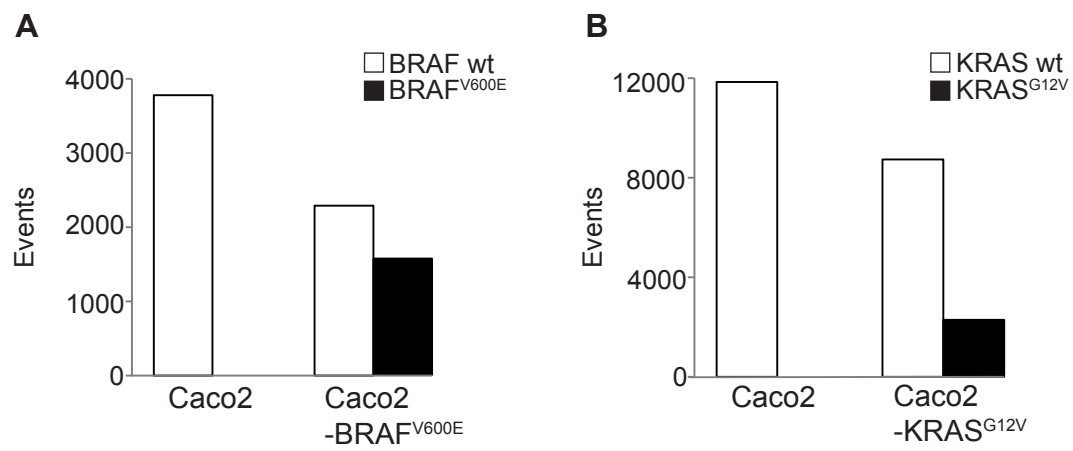

**Figure S1: Successful transfection of pMCEF-BRAF<sup>V600E</sup> or pcDNA3-KRAS<sup>G12V</sup> into Caco2 colon cancer cell line.** BRAF<sup>V600E</sup> (A) or KRAS<sup>G12V</sup> (B) was detected by digital droplet PCR, using the Bio-RadQX200 ddPCR platform.
